# Supplementary material for: Upregulating endogenous genes by an RNA-programmable artificial transactivator
Source: PubMed Central journal article supplement (PMC4652751; doi:10.1093/nar/gkv682), 2015-07-07
Supplement: supp_gkv682_nar-00812-y-2014-File009.pdf [file supp_gkv682_nar-00812-y-2014-File009.pdf]

## **SUPPLEMENTARY INFORMATION**

**[Upregulating endogenous genes by an RNA-programmable artificial transactivator, by Fimiani et al.]**

**Contents:**

**- SUPPLEMENTARY FIGURES S1-S11**

**- SUPPLEMENTARY TABLES S1-S7**

## SUPPLEMENTARY FIGURES

**Supplementary Figure S1. Evaluation of HEK293T cell cotransfection efficiency.** (a) Absolute frequencies of fluorescent elements, evaluated 72 hours after LipoD co-transfection of HEK293T cells with equimolar amounts of P<sub>gkp1</sub>-mCherry (8.0kb) and CMVp-EGFP (4.7kb) plasmids. In x, total amounts of DNA delivered to 10<sup>6</sup> cells are indicated. (b) Surviving fractions of cells referred to in (a). Data normalized against untransfected cells. (c) Dark and bright field pictures of cells referred to in (a), transfected with 2 μg of total DNA /10<sup>6</sup> cells.

Figure S1

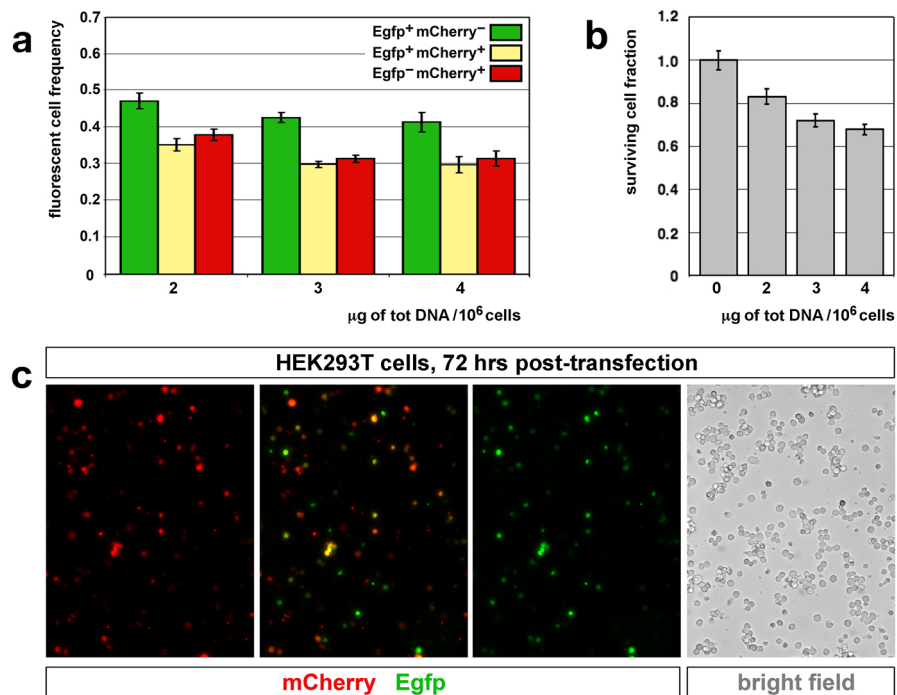

**Supplementary Figure S2. Requirement of the VP16 domain for the NMHV function.** *NAP22*-mRNA levels in HEK293T cells cotransfected by NMHV, NMHE, EGFP, MF6-NAP22 and MF6-Ø, in different combinations. Results were normalized against *GAPDH* and further normalized against EGFP/MF6-Ø controls. Time-frame of the experiments and statistical parameters were as in Figure 1.

Figure S2

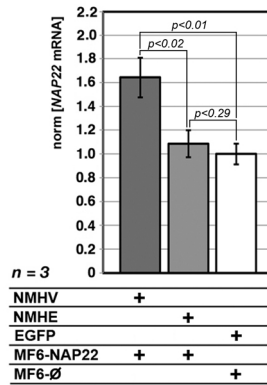

**Supplementary Figure S3. Specificity of NMHV-mediated *FMR1*, *NAP22* and *NRGN* transactivation: no perturbation of other active genes and structurally similar, potential offtargets.** No aspecific gene upregulation in HEK293T cells expressing NMHV and the MF6-type, *FMR1.1* (a), *NAP22* (b) or *NRGN* (c) baits. *FXR1*, *SLC4A2* and *EGR3* are potential offtargets, with 5' ends displaying remarkable homology to *FMR1.1*, *NAP22* and *NRGN* baits, respectively (see Supplementary Table S5). Results were normalized against *GAPDH* and further normalized against EGFP/MF6- $\emptyset$  controls. Time-frame of the experiments and statistical parameters were as in Figure 1.

Figure S3

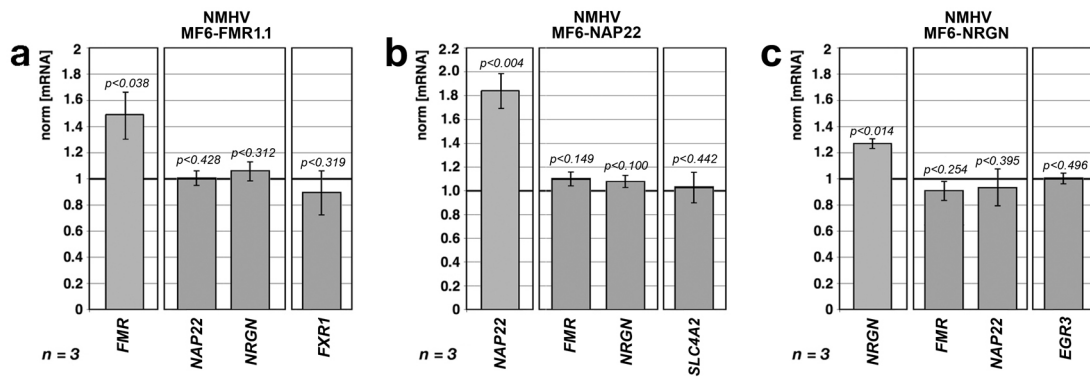

**Supplementary Figure S4. Specificity of NMHV-mediated *FMR1*, *NAP22* and *NRGN* transactivation: limited cis-propagation and polarity effects.** (a) Absent upregulation of transcripts stemming from TSSs >0.5kb far from bait-targets, in HEK293T cells co-expressing NMHV and the MF6-type, *FMR1.1*, *NAP22* or *NRGN* baits. (b) Upregulation of transcripts originating from *FMR1*-TSSs, being <0.5kb far from bait-target, in HEK293T cells co-expressing NMHV and the sense-oriented, MF6-type, *FMR1.2* bait. (c) Variable modulation of transcripts stemming from TSSs <0.5kb apart from bait-targets, in HEK293T cells co-expressing NMHV and the antisense-oriented, MF6-type, *FMR1.1-AS*, *FMR1.2-AS*, *NRGN-AS* or *NAP22-AS* baits. In each case, transcript upregulation by NMHV and the corresponding sense-oriented bait is shown as a reference. Time-frame of the experiments, data normalization and statistical parameters were as in Figure 1.

Figure S4

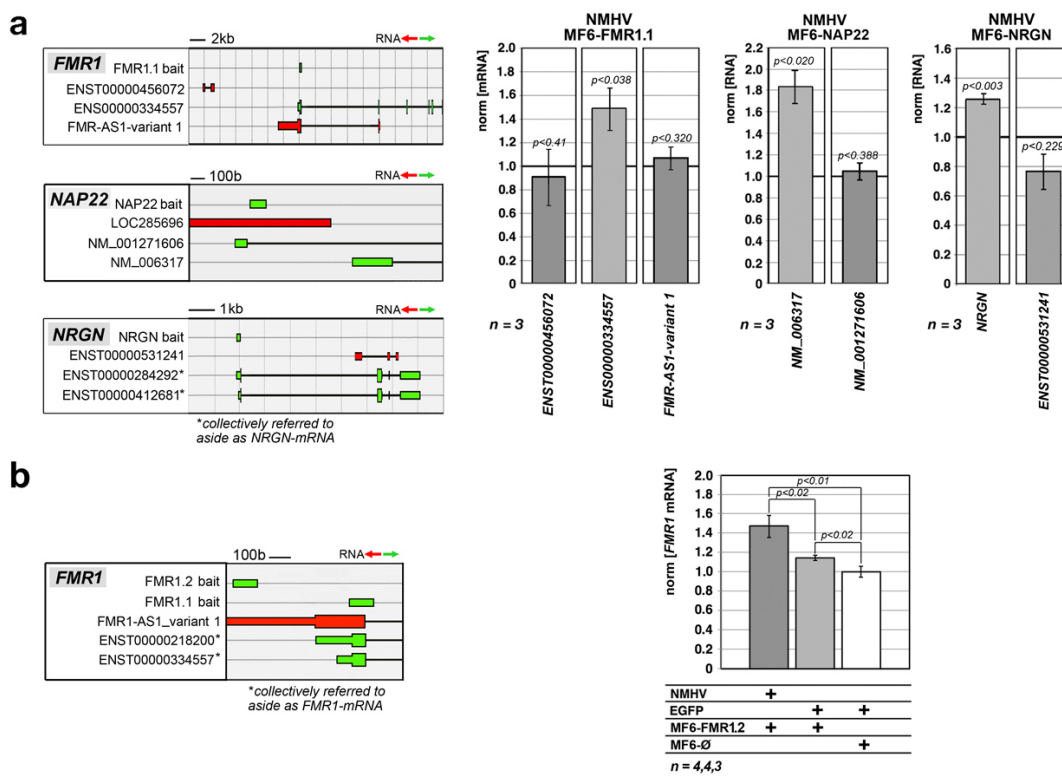

(split picture, to be continued)

Figure S4

**C**

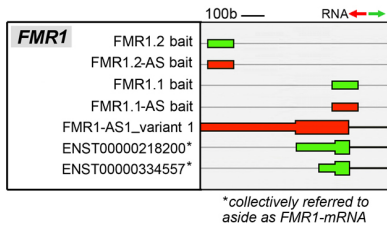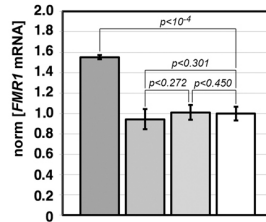

|              |   |   |   |   |
|--------------|---|---|---|---|
| NMHV         | + | + |   |   |
| EGFP         |   |   | + | + |
| MF6-FMR11    | + |   |   |   |
| MF6-FMR11-AS |   | + | + |   |
| MF6-∅        |   |   |   | + |

$n = 3,3,3,3$

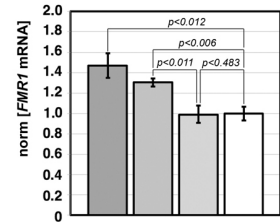

|              |   |   |   |   |
|--------------|---|---|---|---|
| NMHV         | + | + |   |   |
| EGFP         |   |   | + | + |
| MF6-FMR12    | + |   |   |   |
| MF6-FMR12-AS |   | + | + |   |
| MF6-∅        |   |   |   | + |

$n = 4,3,3,3$

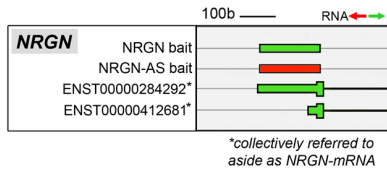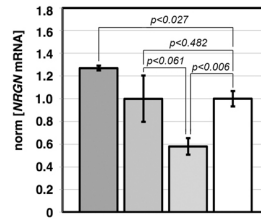

|             |   |   |   |   |
|-------------|---|---|---|---|
| NMHV        | + | + |   |   |
| EGFP        |   |   | + | + |
| MF6-NRGN    | + |   |   |   |
| MF6-NRGN-AS |   | + | + |   |
| MF6-∅       |   |   |   | + |

$n = 3,3,3,3$

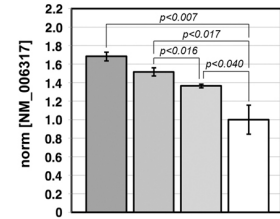

|              |   |   |   |   |
|--------------|---|---|---|---|
| NMHV         | + | + |   |   |
| EGFP         |   |   | + | + |
| MF6-NAP22    | + |   |   |   |
| MF6-NAP22-AS |   | + | + |   |
| MF6-∅        |   |   |   | + |

$n = 3,3,3,3$

**Supplementary Figure S5 Improving the transfection efficiency of HEK293T cells results in a consistent increase of NMHV/MF6-bait-dependent gene transactivation. (a)** Dark and bright field pictures of HEK293T cells co-transfected with equimolar amounts of Pgkp1-mCherry (8.0kb) and CMVp-EGFP (4.7kb) plasmids (2.5  $\mu$ g of total DNA/ $10^6$  cells). Analysis performed 72 hours after completion of the two-steps, Lipofectamine 3000 transfection procedure. **(b)** Absolute frequencies of fluorescent elements, referred to in **(a)**. **(c,d)** Upregulation of *NAP22* and *NRGN* mRNAs in HEK293T cells cotransfected with NMHV- and MF6-bait-encoding plasmids, according to the procedure shown in **(a)**. Pgkp1-EGFP ("EGFP") and MF6- $\emptyset$  plasmids were used as controls. Results were normalized against *GAPDH* and further normalized against the EGFP/MF6- $\emptyset$  combination. Numbers of biological replicates, *n*, are displayed under the graphs. Bars represent s.e.m.'s.

Figure S5

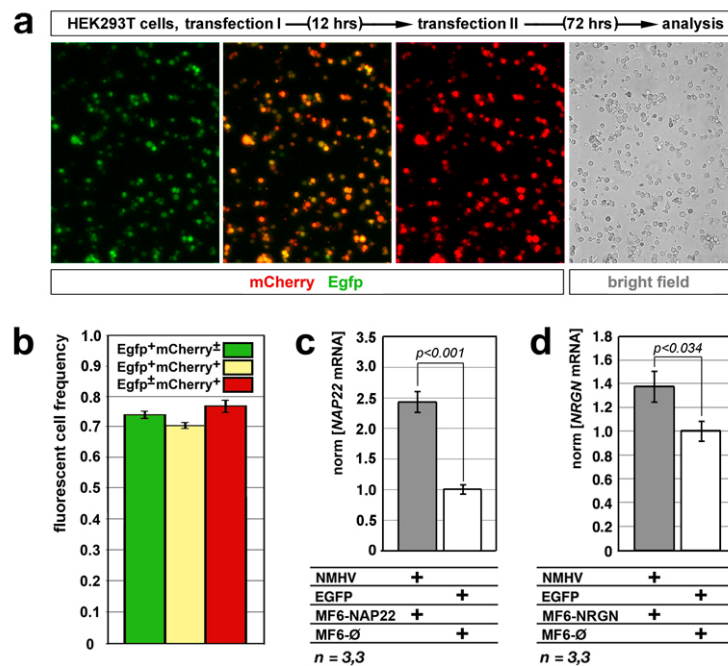

**Supplementary Figure S6. Fraction of *NAP22* chromatin immunoprecipitated by anti-RNAPoIII, in HEK293T cells expressing NMHV/MF6-NAP22 or NMHV/MF6- $\emptyset$ .** Graphs refer to results of the experiments described in Figure 2d, prior to normalization against NMHV/MF6- $\emptyset$  controls. They include results of additional control tests, run challenging NMHV/MF6- $\emptyset$  cells by IgGs, in place of anti-RNAPoIII. *n* are numbers of biological replicates. Bars represent s.e.m.'s.

Figure S6

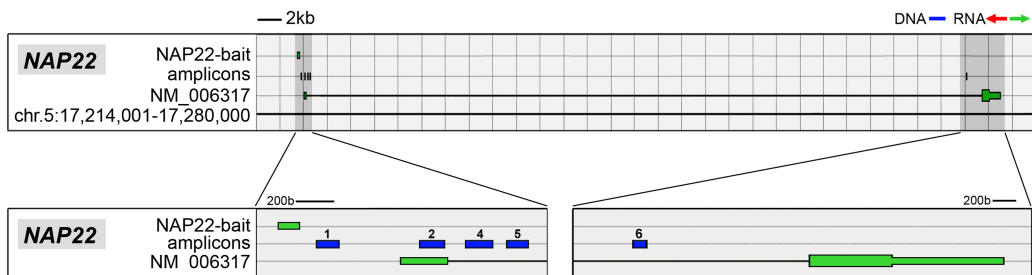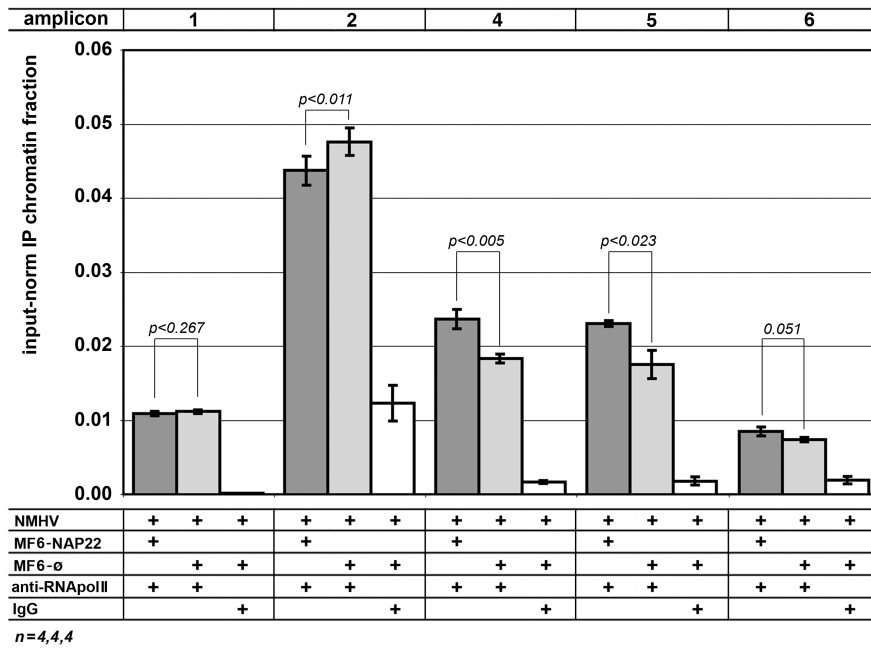



**Supplementary Figure S7. Lentivirus dose-dependent infection of rhombo-spinal precursors.**

Correlation between multiplicity of infection (moi) and effective transduction rate, upon treatment of dissociated E10.5 rhombo-spinal precursors by the constitutive EGFP expressor pCCLsin.PPT.hPGK.EGFP.Wpre (37), as assessed 4 days upon infection. Tests performed in sextuplicate. Bars represent s.e.m.'s.

Figure S7

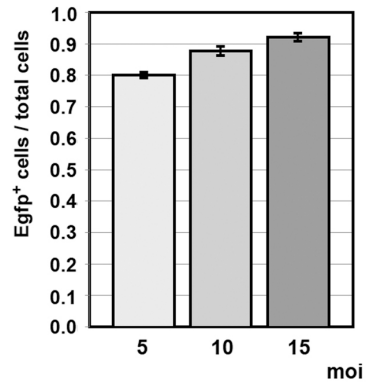

**Supplementary Figure S8. Unaltered *Emx2* expression upon infection of cortico-cerebral precursors by control lentiviruses.** *Emx2*-mRNA levels in uninfected cells and precursors co-infected with the control EGFP- and MF1-Ø-encoding lentivectors. Results were normalized against *Gapdh* and further normalized against uninfected cells. Time-frame of the experiments as well as representation of moi's and statistical parameters were as in Figure 3

Figure S8

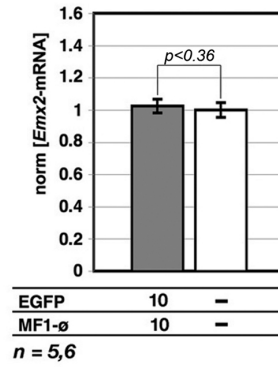

**Supplementary Figure S9. Impact of *Emx2*-bait overexpression on neuronogenesis.** No modulation of frequency of *Tubb3*<sup>+</sup> neurons in cultures of EGFP/MF1-*Emx2*-overexpressing precursors, as assayed by immunofluorescence. Results were normalized against EGFP/MF1-∅ controls. Time-frame of the experiments as well as representation of moi's and statistical parameters were as in Figure 3.

Figure S9

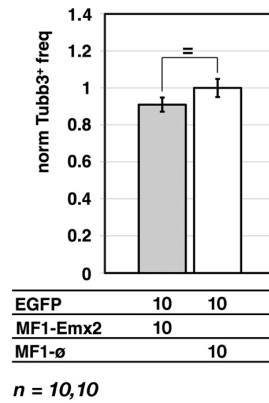

**Supplementary Figure S10. Specificity of NMHV-mediated *Emx2* and *FoxG1* transactivation: no perturbation of other active genes and structurally similar, potential offtargets.** Absence of aspecific gene transactivation in neural precursors overexpressing *Emx2* (a), upon LV\_NMHV / LV\_MF2-*Emx2* infection, or *FoxG1* (b), upon LV\_NMHV / LV\_MF1-*FoxG1* infection. *Pax6*, *Hes6*, *Sip1*, *Couptf1*, *Nf1a* and *Lhx2* are randomly chosen genes active in cortico-cerebral precursors. *Arid1a*, *CachD1*, *Ptpn12* and *Dvl3* are potential offtargets, with 5' ends displaying remarkable homology to the *Emx2* bait (see Supplementary Table S6). Results were normalized against *Gapdh* and further normalized against EGFP/MF2- $\emptyset$  and EGFP/MF1- $\emptyset$  controls, respectively. Time-frame of the experiments as well as representation of moi's and statistical parameters were as in Figure 3.

Figure S10

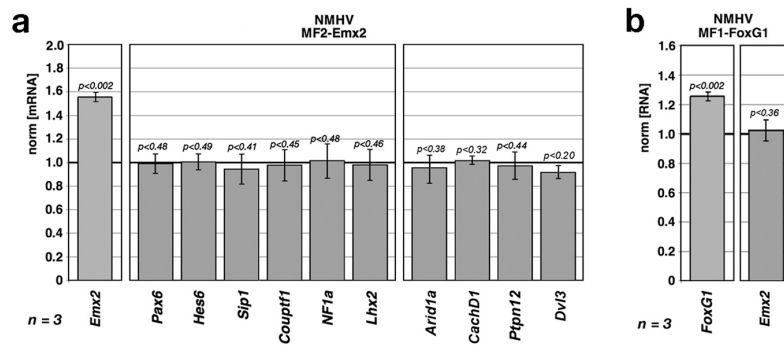

**Supplementary Figure S11. Specificity of NMHV-mediated *Emx2* and *FoxG1* transactivation: limited cis-propagation and polarity effects. (a)** No upregulation of *Emx2* mRNA, in cortical precursors co-expressing NMHV and the antisense-oriented, MF1-type, *Emx2*-AS bait. *Emx2* mRNA upregulation by NMHV and the corresponding sense-oriented bait is shown as a reference. **(b)** No upregulation of transcripts stemming from TSSs >1.5kb far from the bait-target, in neural precursors co-expressing NMHV and the MF1-type, *FoxG1* bait. Time-frame of the experiments, representation of moi's, data normalization and statistical parameters were as in Figure 3.

Figure S11

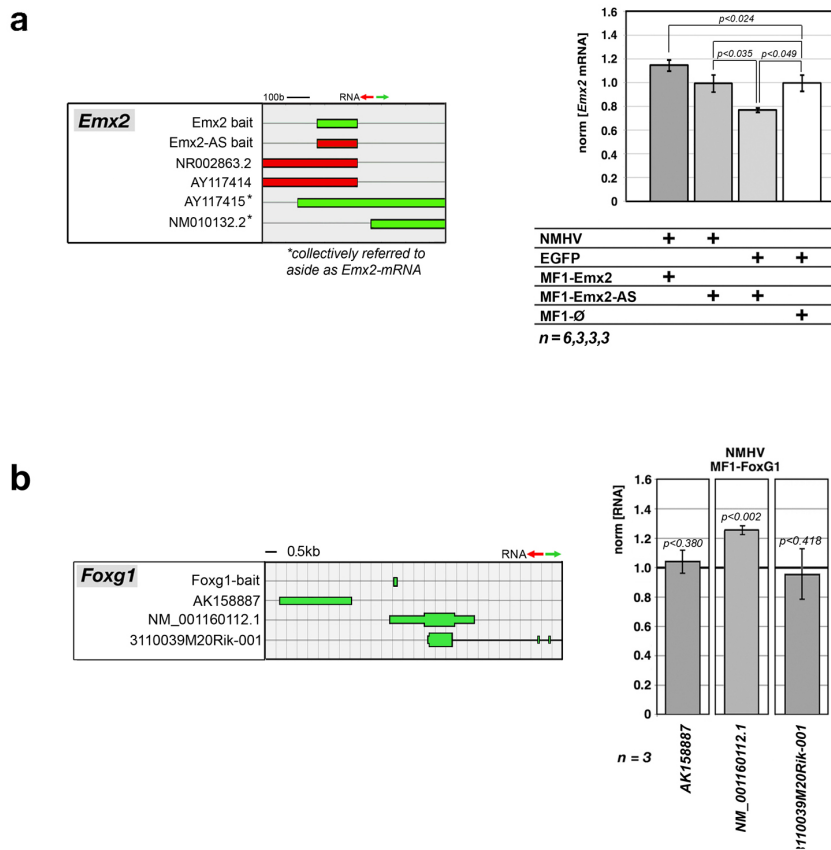

**Supplementary Table S1. Wild type baits I**

| bait name  | bait genomic coordinates                 | bait length | bait orientation vs TSS | bait midpoint distance from TSS | bait CG% | bait cloning oligos - sequence (5'-3')                                                                        |
|------------|------------------------------------------|-------------|-------------------------|---------------------------------|----------|---------------------------------------------------------------------------------------------------------------|
| FMR1.1     | hg19_chrX(+)_nt 146,993,634-146,993,748  | 115b        | S                       | +222b                           | 68%      | FMR1b/F - CCCGGATCCCCTCGAGCGCCCGCAGCCCA<br>FMR1b /R - CCCGTCGACCTTGTAGAAAGCGCCATTGGAGCCC                      |
| FMR1.2     | hg19_chrX(+)_nt 146,993,101-146,993,220  | 120b        | S                       | -308b                           | 61%      | FMR1-UPTSb.S/F - CCCGGATCCCCAGAGAGGCCGAACTGGGATAACC<br>FMR1- UPTSb.S/R - CCCGTCGACCGTGAAGGGCGGTGACAGGTGCGCA   |
| NAP22      | hg19_chr5(+)_nt 17,217,026-17,217,142    | 117b        | S                       | +153b                           | 62%      | NAP22b/F - CCCGGATCCCGTCGGGAGCGGGCTGGACTG<br>NAP22b/R - CCCGTCGACGTTGGATAAGAAGTGCTCGGGCTCTC                   |
| NRGN       | hg19_chr11(+)_nt 124,609,848+124,609,995 | 148b        | S                       | +92b                            | 74%      | NRGRb/F - CCCGGATCCCAGAGCAGAGCTGCTGTTTCGGC<br>NRGRb/R - CCCCTCGAGGGTGCAGCAGTCCATGCTGGTGTC                     |
| FMR1.1-AS  | hg19_chrX(-)_nt 146,993,634-146,993,748  | 115b        | AS                      | +222b                           | 68%      | FMR1b-AS/F - CCCGGATCCCCTTGTAGAAAGCGCCATTGGAGCCC<br>FMR1b-AS/R - CCCGTCGACCCCTCGAGCGCCCGCAGCCCA               |
| FMR1.2-AS  | hg19_chrX(-)_nt 146,993,101-146,993,220  | 120b        | AS                      | -308b                           | 61%      | FMR1-UPTSb.AS/F - CCCGGATCCCGTGAAGGGCGGTGACAGGTGCGCA<br>FMR1- UPTSb.AS/R - CCCGTCGACCCAGAGAGGCCGAACTGGGATAACC |
| NAP22-AS   | hg19_chr5(-)_nt 17,217,026-17,217,142    | 117b        | AS                      | +153b                           | 62%      | NAP22b-AS/F - CCCGGATCCCGTGGATAAGAAGTGCTCGGGCTCTC<br>NAP22b-AS/R - CCCGTCGACCGTCCGGGAGCGGGCTGGACTG            |
| NRGN-AS    | hg19_chr11(-)_nt 124,609,848+124,609,995 | 148b        | AS                      | +92b                            | 74%      | NRGRb-AS/F - CCCGGATCCCGTGCAGCAGTCCATGCTGGTGTC<br>NRGRb-AS/R - CCCCTCGAGCGAGAGCAGAGTCTGTTTCGGC                |
| FMR1.1.60L | hg19_chrX(+)_nt 146,993,634-146,993,698  | 65b         | S                       | +197b                           | 74%      | FMR1b/F - CCCGGATCCCCTCGAGCGCCCGCAGCCCA<br>FMR65/R - CCCGTCGACTTCTCTTTCAGCCCTGCTAGCGCC                        |
| FMR1.1.60R | hg19_chrX(+)_nt 146,993,688-146,993,748  | 61b         | S                       | +249b                           | 56%      | FMR61/F - CCCGGATCCTGAAGAGAAGATGGAGGAGCTGGTGG<br>FMR1b /R - CCCGTCGACCTTGTAGAAAGCGCCATTGGAGCCC                |
| NAP22.60L  | hg19_chr5(+)_nt 17,217,026-17,217,090    | 65b         | S                       | +126b                           | 65%      | NAP22b/F - CCCGGATCCCGTCGGGAGCGGGCTGGACTG<br>NAP65/R - CCCGTCGACGTGATGAATGACACCCCTGGCACC                      |
| NAP22.60R  | hg19_chr5(+)_nt 17,217,080-17,217,142    | 63b         | S                       | +181b                           | 54%      | NAP63/F - CCCGGATCCTCATTCATCACCTCGAGGCAGTCCCTA<br>NAP22b/R - CCCGTCGACGTTGGATAAGAAGTGCTCGGGCTCTC              |

**Supplementary Table S2. Wild type baits II**

| bait name       | bait genomic coordinates               | bait length | bait orientation vs TSS | bait midpoint distance from TSS | bait CG% | bait cloning oligos - sequence (5'-3')                                                                   |
|-----------------|----------------------------------------|-------------|-------------------------|---------------------------------|----------|----------------------------------------------------------------------------------------------------------|
| Emx2 (Emx2.179) | mm10_chr19(+)_nt 59,458,457-59,458,635 | 179b        | S                       | +174b                           | 70%      | Emx2.179-S/F - CCCAGATCTGCCGCAGGAGCGAGGGAGCTAGC<br>Emx2.179-S/R - CCCCTCGAGGACTTTTAAAGTGCCTCAGAGGGAGG    |
| Emx2.120        | mm10_chr19(+)_nt 59,458,457-59,458,576 | 120b        | S                       | +144b                           | 74%      | Emx2.179-S/F - CCCAGATCTGCCGCAGGAGCGAGGGAGCTAGC<br>E2b.120/R - GGGCTCGAGGGCCAGAATGGAACGGAGTCGG           |
| Emx2.60         | mm10_chr19(+)_nt 59,458,457-59,458,516 | 60b         | S                       | +114b                           | 73%      | Emx2.179-S/F - CCCAGATCTGCCGCAGGAGCGAGGGAGCTAGC<br>E2b.60/R - GGGCTCGAGCCGCCGACCTTTGGTGTCTTCGCC          |
| Emx2.30         | mm10_chr19(+)_nt 59,458,457-59,458,486 | 30b         | S                       | +99b                            | 77%      | E2b.30/F - GATCTGCCGCAGGAGCGAGGGAGCTAGCCCGGAGCC<br>E2b.30/R - TCGAGGCTCCGGCTAGCTCCCTCGCTCCTGCGGCA        |
| Emx2-AS         | mm10_chr19(-)_nt 59,458,457-59,458,635 | 179b        | AS                      | +174b                           | 70%      | Emx2.179-AS/F - CCCAGATCTGACTCTTTAAAGTGCCTCAGAGGGAGG<br>Emx2.179-AS/R - CCCCTCGAGGCCGCAGGAGCGAGGGAGCTAGC |
| FoxG1           | mm10_chr12_nt 49,383,099-49,383,244    | 146b        | S                       | +165b                           | 59%      | FoxG1.146-S/F - CCCAGATCTAGTACTGCCTAGAAAGCTGAAGAGG<br>FoxG1.146-S/R - CCCCTCGAGACCCAACAGTCCCGAAATAAAGC   |

**Supplementary Table S3. qRTPCR oligos**

| gene                                 | oligos - sequence (5'-3')                                                                                    |
|--------------------------------------|--------------------------------------------------------------------------------------------------------------|
| <i>3110039M20Rik-001</i>             | RykM20.1/F - CCTGCCTCCATACTCCAGCTTCTCC<br>RykM20.1/R - CCCGCACGGGTGAGGCGATCTC                                |
| <i>AK158887</i>                      | AK158887.1108/F - TGGACTGCATTGATTCCCTGGGCAACTAGG<br>AK158887.1250/R - TTGAGCCCCCTGGTAAGTAAGACTCCAG           |
| <i>Arid1a</i>                        | Arid1a.201/F - GCAGATGGAACACCCAAGACAGAATCCAAATC<br>Arid1a.201/R - TCTCGGGCTCACCACCCAACCTCATACA               |
| <i>CachD1</i>                        | Cachd1-001/F - GTGAACAGCCGAGCCTTCAACCCAGGA<br>Cachd1-001/R - CCCTTCTTCTGAGCTGAAATATTGCCACTTGAT               |
| <i>Couptf1</i>                       | Couptf1/F - CTTTCATGGACCACATCCGCATCTTTCAGGAACAG<br>Couptf1/R - TCACATACTCCTCCAGGGCACACTGTGATTTCTC            |
| <i>Dvl3</i>                          | Dvl3.ex13/F - CTACATCTTTGGCGACCTCTGTGGTAACAT<br>Dvl3.ex14/R - GGAGCCAGTGTGTCTGGTCAGAG                        |
| <i>EGR3</i>                          | EGR3.001/F - CGGCAGCAGCGACTCGGTAGTCCATT<br>EGR3.001/R - GCTGGAAGGAGCCGGAGTAAGAGAGTT                          |
| <i>Emx2</i>                          | Emx2.E2S/N2F - GGAAGAAGCAGCTGGCTCACAGTCTCAGTCTTAC<br>Emx2.E2S/N2R - GTGGTGTGTCCCTTTTCTTCTGTTGAGAATCTGAGCCTTC |
| <i>ENST00000531241</i>               | ENST531241/F - ATTACCTTTGAAAATGCTCAGTTCTTCTTCGGTC<br>ENST531241/R - TCCTATCTCCTGTGTTTGGAGTTCATCCTG           |
| <i>ENST00000456072</i>               | ENST456072/F - ATGCCTGCCTTGTTATGGATGTGACAC<br>ENST56072/R - CTGATCGTAGCTCACTGTAGCCTCAAACCTC                  |
| <i>FMR1</i>                          | hFMR1/F - GAAGATTCAATAACAGTTGCATTTGAAAACAACCTGG<br>hFMR1/R - GCTCTGGAATACACCTCAACTTCATCAC                    |
| <i>FMR-AS1-v1</i>                    | NR024503/F - CCATTCCTGAAAAGCACTCAAACCTGGACTTGAA<br>NR024503/R - GGGCTCCAATGGCGCTTTCTACAAGG                   |
| <i>FoxG1</i>                         | FoxG1.2193/F - TGGAGTGTGAGCGAGGTGCAATGTFGG<br>FoxG1.2303/R - TACTGCACACATGGAATCTGGCAGCC                      |
| <i>FXR1</i>                          | FXR1.001/F - GCGGCTCTAACGGGGCTTTCTACAAGG<br>FXR1.001/R - CTTTCATTAATGGAACCTGGCGTTCTGGTTG                     |
| <i>Gapdh</i>                         | Gapdh.5/F - ATCTTCTTGTGTCAGTGCAGCCTCGTC<br>Gapdh.5/R - GAACATGTAGACCATGTAGTTGAGGTCAATGAAGG                   |
| <i>Hes6</i>                          | Hes6/FI - GGAAGCACGGGGGACCGCAAG<br>Hes6/RE - TGCACTGGATGTAGCCAGCAGCGAAG                                      |
| <i>Lhx2</i>                          | Lhx2/ForM - GGCAAGCCCTTCTCGGGGACGCGCATC<br>Lhx2/RevM - GCACACAACGCTGCCGGTCACTGCTGATGGACGG                    |
| <i>NM_006317<br/>(NAP22-var1)</i>    | hNAP22/F - GGGGCTGCATAGGCACCCAGAG<br>hNAP22/R - CCTCGGCCTTCTGTCTTCTCTCTTG                                    |
| <i>Nf1a</i>                          | Nf1a/F - GGCCTACTTCTCACACCCAGCCATCCGTTAC<br>Nf1a/R - GTGCACCTTGCCCTTGACTGCTTCCATTGG                          |
| <i>NM_001271606<br/>(NAP22-var2)</i> | Nap22/F2 - CTCACCCCAACCTCGCTGCCAG<br>Nap22/R2 - GGCCTTCTGTCTTCTCTCTTGGCTTTC                                  |
| <i>NRGR</i>                          | hNRGR/F2 - GGAGACTAGGCCAGAATGAGCATTTTCAA<br>hNRGR/R2 - CAGGGAAGTCTCGTCCGTCGGAAG                              |
| <i>Pax6</i>                          | Pax6/ForM - CCAAGGGCGGTGAGCAGATGTGTGAGATCTTCTATTCTAG<br>Pax6/RevM - CCCGTTGACAAAGACACCACCAAGCTGATTCACCTC     |
| <i>Ptpn12</i>                        | Ptpn12.001/FN - GCCTTTGGCGAATACAGTCATAGACTTCTGGGA<br>Ptpn12.001/R - CTTTTCTCTCCATCTCAAATCTCGACAGGC           |
| <i>SCL4A2</i>                        | SCL4A2/F - CTCCTCTCCTTCCGAGTCTCCT<br>SCL4A2/R - CAGAGATGACCATCTGTCCACCAC                                     |
| <i>Sip1</i>                          | Sip1/F2 - CGAGAGGCATATGGTGACGCACAAG<br>Sip1/R1 - CACTGTGAATTCAGGTGTTCTTTCAGGT                                |



**Supplementary Table S4. ChIP oligos**

| ChIP amplicon           | oligos - sequences (5'-3')                                                            |
|-------------------------|---------------------------------------------------------------------------------------|
| <i>NAP22_amplicon 1</i> | NapIP/F - GAGAAGTCCACGGACAGCCCAGG<br>NapIP/R - GTGCCCCGCCAACGTTTCCTAAATG              |
| <i>NAP22_amplicon 2</i> | Nap225UTR/F - GCTCCAACCTGGCTCCTCGCTCC<br>Nap225UTR/R - GTGCCTATGCAGCCCCTGAGTTAG       |
| <i>NAP22_amplicon 3</i> | Nap22jun/F - GGGGCTGCATAGGCACCCAGAG<br>Nap22jun/R - CTGCTGCCCGCTGCATGAAGGGA           |
| <i>NAP22_amplicon 4</i> | Nap22i1/F - TCCCTTCATGCAGCGGGCAGCAG<br>Nap22i1/R - CCCTCCACCATGCGAGCGGC               |
| <i>NAP22_amplicon 5</i> | Nap22i3/F - GGTGACGGGAGGAATTGCCGAATG<br>Nap22i3/R - CTTTCTCCCAGGCTGGTAAGGGCT          |
| <i>NAP22_amplicon 6</i> | Nap22i2/F - CAGTTCTGCCAGTGGACCTGACCTG<br>Nap22i2/R - GTCCCATAAATGAGAAAAGCCAGGAG       |
| <i>SLC4A2</i>           | SLC4IP/F2 - GCTATTGGTCACTGGCCCAGAGG<br>SLC4IP/R2 - CTGAGGCCGCAGGAGGAAGTCCAT           |
| <i>Emx2</i>             | Emx2.α/Fint - ATTTACCAGGCTTCGGAGGAAGCTG<br>Emx2.α/Rint - CATGGAAGTGTTCGCTTCTTCACTAGTA |
| <i>CachD1</i>           | CachdIP/F - AAAGTTTGGCGGGCTGCGCCTCC<br>CachdIP/R - CCGGCCTTACGGTCTCCTCTTCCT           |
| <i>Dvl3</i>             | Dvl3IP/F - CCGTACCTGGTGAAGCTGCCCT<br>Dvl3IP/R - CCAAAATCGTCCATAGACTGAAGAAG            |
| <i>Ptpn12</i>           | PtpnIP/F - GGGACTTCATGGTGAGTGTCCGTTCT<br>PtpnIP/R - CCTGTCCTCGCACCCACACAAA            |

**Supplementary Table S5. Off-target/on-target comparisons**

| off-target gene<br>(on-target gene) | off-target sequence location:<br>- hg19 coordinates<br>- distance from off-target gene TSS, relative orientation | off-target vs on-target comparison                                                                                                                                                                                                                                                                                                                                                                                                                                                                                                                                                                                                                                                                                                                                                                                                                                  | gap density    | homology       |
|-------------------------------------|------------------------------------------------------------------------------------------------------------------|---------------------------------------------------------------------------------------------------------------------------------------------------------------------------------------------------------------------------------------------------------------------------------------------------------------------------------------------------------------------------------------------------------------------------------------------------------------------------------------------------------------------------------------------------------------------------------------------------------------------------------------------------------------------------------------------------------------------------------------------------------------------------------------------------------------------------------------------------------------------|----------------|----------------|
| <i>SLC4A2</i><br>( <i>NAP22</i> )   | - chr.7(-):150759353-150759431<br>- circa -0.3kb, antisense                                                      | <pre> off  1  GGGTCTGAGACGGGTTGCTGGGTGAGAGACCCA-GGGTTCTCAAAGTTCCTCAACCGCTG  59                                                                           on   22  GGGTCTGAGAAGGGTAGCT-GGTG-----CCAGGGGGTGTCA---TTCATC-ACCTC-G  69  off  60  AGGCTAAGCTACCTAGTCT  79                               on   70  AGGC--AGCTCCCTAAGTCT  87 </pre>                                                                                                                                                                                                                                                                                                                                                                                                                                                                                                                          | 15/80<br>(19%) | 57/80<br>(71%) |
| <i>FXR1</i><br>( <i>FMR1</i> )      | - chr.3(+):180,630,471-180,630,524<br>- circa +0.3kb, sense                                                      | <pre> off  1  AACATGGCGGAGCTGACGGTGGAGGTTTCGCGGCTCTAACGGGGCTTTCTACAAG  54                                                                       on   62  AAGATGGAGGAGCTGGTGGTGAAGTGCAGGGGCTCCAATGGCGCTTTCTACAAG  115 </pre>                                                                                                                                                                                                                                                                                                                                                                                                                                                                                                                                                                                                                                         | 0/54<br>(0%)   | 44/54<br>(81%) |
| <i>EGR3</i><br>( <i>NRGN</i> )      | - chr.8(+):22,550,683-22,550,780<br>- circa +0.05kb, sense                                                       | <pre> off  5  GGGTGCCTCAGCTGGTGCGGTATGAGGCTGGGTCGT-GGG-GGGGGTGGGGCGTGTGCGG  62                                                                       on  121  GGGT-CCTCTGCGGGGACG--A--AGGCTGG--CGCAGGGCGGGGGTGGGGTCTGT----  73  off  63  GGGGTG--GGGTGGGGCTGGGCTGGGG  88                                                                       on   72  GTGGTGCCGGGTGGGGGCT---CTGGGG  48  off  59  GCGGGGGTGGGGTGGGGCTGG-GCTGGG-GGGGATCT  96                                                                       on   89  GC-GGGGGTGGGGTCTGTG-TGGTGCCGGGTGGGGGCTCT  52  off  31  GCTGG-GTCGTGGGGGGGTGGGGCGTGTGCGGGG-GGTGGGGTGGGGGCTGGGCTGGGG  88                                                                       on  133  GCTGGTGTGCG---GGGGT----CCTCTGCGGGGACGAAGGCT-GGCGCAGGGCGGGGG  83  off  89  GGGGATCT  96               on   82  TGGGGTCT  75 </pre> | 18/88<br>(20%) | 62/88<br>(70%) |
|                                     |                                                                                                                  |                                                                                                                                                                                                                                                                                                                                                                                                                                                                                                                                                                                                                                                                                                                                                                                                                                                                     | 4/40<br>(10%)  | 31/40<br>(78%) |
|                                     |                                                                                                                  |                                                                                                                                                                                                                                                                                                                                                                                                                                                                                                                                                                                                                                                                                                                                                                                                                                                                     | 11/68<br>(16%) | 46/68<br>(68%) |



**Supplementary Table S7. Mutant, NAP22.60L-derivative baits.**

| <i>bait</i>       | <i>sequence (5' → 3')</i>                                             |
|-------------------|-----------------------------------------------------------------------|
| NAP22.60L         | CGTCGGGAGCGGGCTGGACTGGGGTCTGAGAAGGGTAGCTGGTGCCAGGGGGTGTTCATTCATCAC    |
| NAP22.60L.mut30.1 | CGTCGGGAGCGGGCTGGACTGGGACTCAGAGGAAACGATCAACGCCAGGGGGTGTTCATTCATCAC    |
| NAP22.60L.mut30.2 | CGTCGGGAGCGGGCTAAGTCAAAACCTGAGAAGGGTAGCTAACATTGAAAGGTGTTCATTCATCAC    |
| NAP22.60L.mut30.3 | CGTCGGGAGCGAATCAAGCTGGGGTCTGAGAGGAAACAGCTGGTGCCAATAACAATTCATTCATCAC   |
| NAP22.60L.mut30.4 | CGTCGGGAGTAAATTTGGACTGGGACTCAAGAAGGGTAATCAATGCCAGGGGACACTATTCATCAC    |
| NAP22.60L.mut15.1 | CGTCGGGAGCGGGCTGGACTGGGGTCTCTCTCCCATGCTGGTGCCAGGGGGTGTTCATTCATCAC     |
| NAP22.60L.mut15.2 | CGTCGGGAGCGGGCTGGAGACCCGTCTGAGAAGGGTAGCTGGACGGTGGGGGTGTTCATTCATCAC    |
| NAP22.60L.mut15.3 | CGTCGGGAGCGGGGACGACTGGGGTCTGAGTTCCGTAGCTGGTGCCAGCCGTGTTCATTCATCAC     |
| NAP22.60L.mut15.4 | CGTCGGGAGCGCCGTGGACTGGGGTGAAGAAGGGTAGGAGGTGCCAGGGGCACATTCATTCATCAC    |
| NAP22.60L.mut15.5 | CGTCGGGAGCCGCTGGACTGCCGTCTGAGAACCGTAGCTGGTCCGAGGGGGTGTAGATTCATTCATCAC |
| NAP22.60L.mut15.6 | CGTCGCGAGCGCGCTGGTCTGGGCTCTGACAAGGGAAGCTGCTGCCACGGGGTCTCATTGATCAC     |
